# Supplementary material
Source: MDPI journal article supplement (https://www.mdpi.com/2410-3896/7/1/24)
Supplement: s1 [file s1]

## **Supplementary Material**

**for**

**Absence of Spin Frustration in the Kagomé Layers of Cu<sup>2+</sup> Ions in Volborthite Cu<sub>3</sub>V<sub>2</sub>O<sub>7</sub>(OH)<sub>2</sub>·2H<sub>2</sub>O and Observation of the Suppression and Re-Entrance of Specific Heat Anomalies in Volborthite under an External Magnetic Field**

**Myung-Hwan Whangbo 1,2,\*, Hyun-Joo Koo 2, Eva Brücher 3, Pascal Puphal 3 and Reinhard K. Kremer 3,\***

<sup>1</sup> Department of Chemistry, North Carolina State University, Raleigh, NC 27695, USA

<sup>2</sup> Department of Chemistry and Research Institute for Basic Sciences, Kyung Hee University, Seoul 02447, Ko-rea; hjkoo@khu.ac.kr

<sup>3</sup> Max Planck Institute for Solid State Research, Heisenbergstrasse 1, 70569 Stuttgart, Germany; e.bruecher@fkf.mpg.de (E.B.); p.puphal@fkf.mpg.de (P.P.)

\* Correspondence: whangbo@ncsu.edu (M.-H.W.); rekre@fkf.mpg.de (R.K.K.);  
Tel.: +1-919-515-3464 (M.-H.W.); +49-711-689-1688 (R.K.K.)

## Spin exchanges of the $I2/a$ and $P2_1/a$ phases of volborthite by energy mapping analysis

To extract the values of the spin exchanges for the  $I2/a$  and  $P2_1/a$  phases of volborthite, we carry out DFT calculations encoded in the VASP<sup>1,2</sup> using the augmented plane wave method<sup>3,4</sup> and the PBE exchange-correlation functional.<sup>5</sup> To take into account the effect of electron correlation of the Cu 3d states, we use the DFT plus on site repulsion (DFT+U) method<sup>6</sup> with  $U_{\text{eff}} = U - J = 4$  and 5 eV.

### A. $I2/a$ phase

To determine the five spin exchanges  $J_1 - J_5$  of the  $I2/a$  phase, we consider six ordered spin states FM, AF(i) ( $i = 1$  to 5) shown in Figure S1. Then, the total spin exchange energies of these states can be written as

$$E = \sum_{i=1}^5 n_i J_i S^2 \quad (\text{S1})$$

where  $S$  refers to the spin of the  $\text{Cu}^{2+}$  ion (i.e.,  $S = 1/2$ ). The values of  $n_i$  ( $i = 1$  to 5) found for the six spin states are listed in Table S1. The relative energies (meV/FU) obtained for the FM, and AFi ( $i = 1 - 5$ ) states by DFT+U calculations are listed in Table S2. By mapping the relative energies of the ordered magnetic states determined by DFT+U calculations to those determined by the spin exchange energies, we obtain the values of the spin exchanges  $J_1 - J_5$  listed in Table S3 and Table 1 of the text.

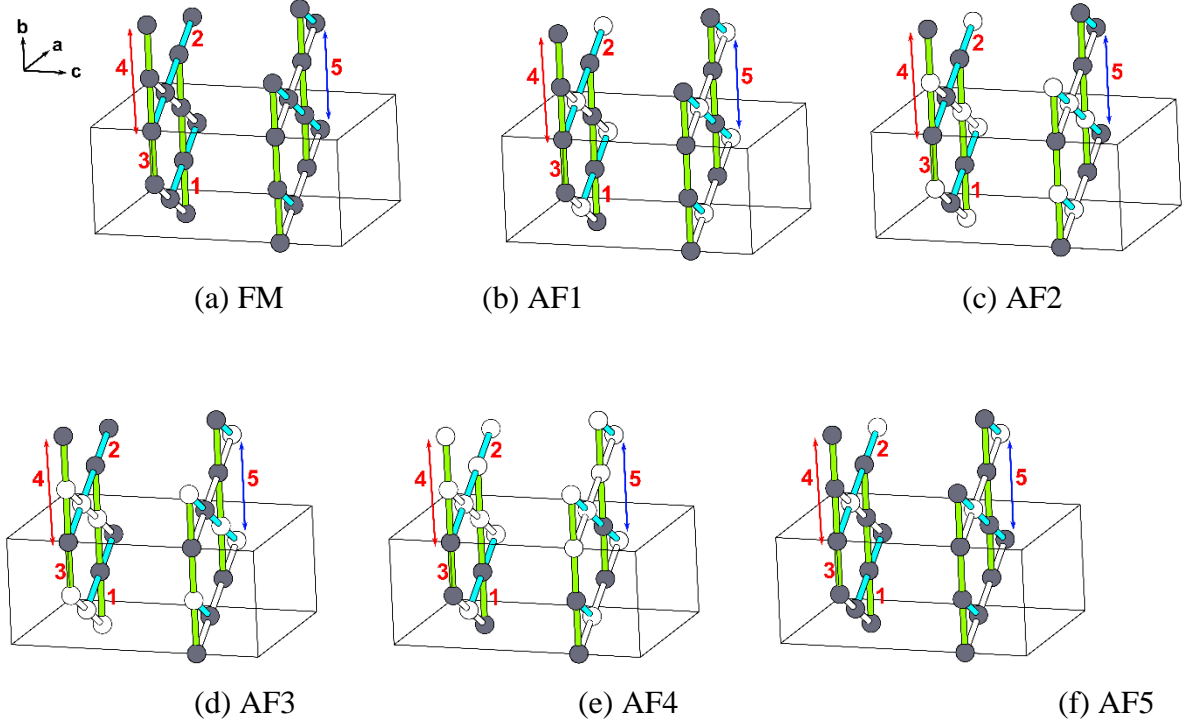

**Figure S1.** Six ordered spin states, i.e., the FM and AF(i) ( $i = 1$  to 5) states, of the  $I2/a$  phase employed for the energy-mapping analysis, where the gray and white circles represent the up and down spin sites of  $\text{Cu}^{2+}$  ions.

**Table S1.** Values of  $n_i$  for the six ordered spin states

|                  | $n_1$ | $n_2$ | $n_3$ | $n_4$ | $n_5$ |
|------------------|-------|-------|-------|-------|-------|
| $E_{\text{FM}}$  | -16   | -16   | -16   | -16   | -8    |
| $E_{\text{AF1}}$ | 16    | 16    | -16   | -16   | -8    |
| $E_{\text{AF2}}$ | -16   | 16    | 16    | -16   | -8    |
| $E_{\text{AF3}}$ | 16    | -16   | 16    | -16   | -8    |
| $E_{\text{AF4}}$ | 0     | 0     | 0     | 16    | -8    |
| $E_{\text{AF5}}$ | 0     | 0     | -16   | -16   | 8     |

**Table S2.** Relative energies (meV/FU) obtained from DFT+U calculations

|     | $U_{\text{eff}} = 4 \text{ eV}$ | $U_{\text{eff}} = 5 \text{ eV}$ |
|-----|---------------------------------|---------------------------------|
| FM  | 47.87                           | 37.85                           |
| AF1 | 0.69                            | 0                               |
| AF2 | 0                               | 0.65                            |
| AF3 | 46.24                           | 38.49                           |
| AF4 | 16.94                           | 13.61                           |
| AF5 | 23.95                           | 18.63                           |

**Table S3.** Values of the spin exchanges  $J_1 - J_5$  (in K) calculated for the  $I2/a$  phase

|           | $U_{\text{eff}} = 4 \text{ eV}$ | $U_{\text{eff}} = 5 \text{ eV}$ |
|-----------|---------------------------------|---------------------------------|
| $J_1/J_2$ | 0.010                           | 0                               |
| $J_3/J_2$ | 0.025                           | -0.017                          |
| $J_4/J_2$ | 0.145                           | 0.149                           |
| $J_5/J_2$ | 0.014                           | 0.016                           |
| $J_2$     | 542 K                           | 439 K                           |

## B. $P2_1/a$ phase

To determine the 10 spin exchanges of the  $P2_1/a$  phase, namely,  $J_1 - J_5$  for the layer 1 and  $J'_1 - J'_5$  for the layer 2, we consider 11 ordered spin states FM, AF(i) ( $i = 1$  to 10) shown in Figure S2. Then, the total spin exchange energies of these states can be written as

$$E = \sum_{i=1}^5 n_i J_i S^2 + \sum_{i=1}^5 n'_i J'_i S^2 \quad (\text{S2})$$

where  $S = 1/2$ . The values of  $n_i$  ( $i = 1$  to 5) and  $n'_i$  ( $i = 1$  to 5) found for the 11 spin states are listed in Table S4. The relative energies (meV/FU) obtained for the FM, and AFi ( $i = 1 - 10$ ) states by DFT+U calculations are listed in Table S5. By mapping the relative energies of the ordered magnetic states determined by DFT+U calculations to those determined by the spin exchange energies, we obtain the values of the spin exchanges listed in Table S6 and Table 1 of the text.

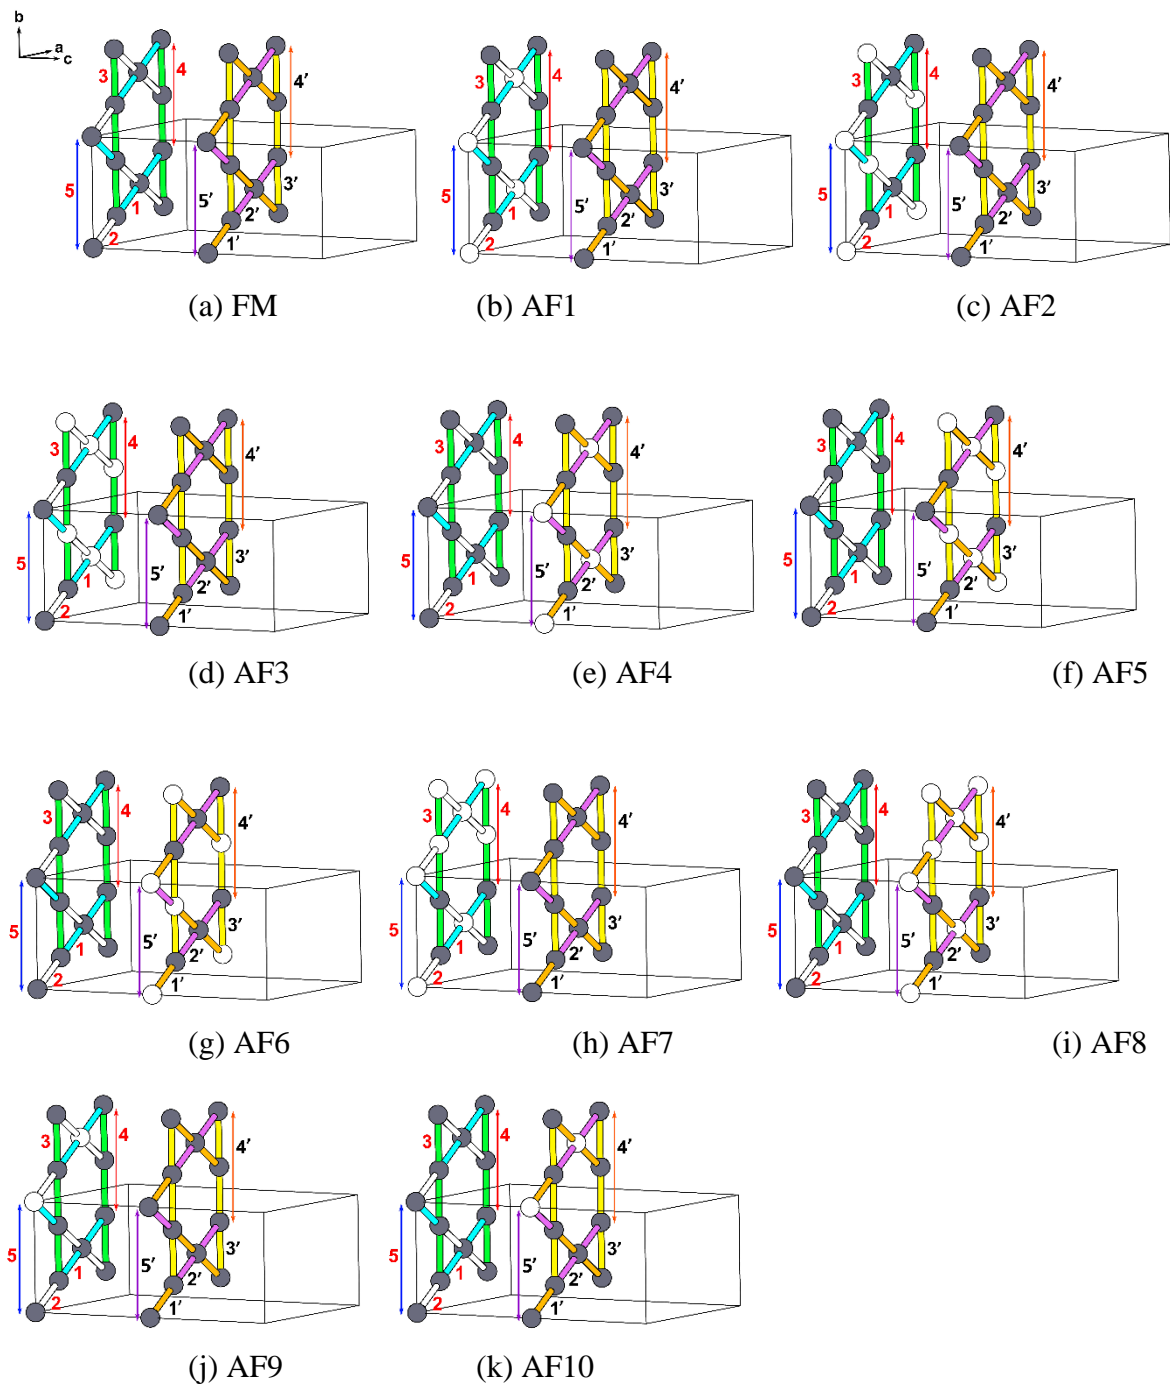

**Figure S2.** 11 ordered spin states, i.e., the FM and AF(i) ( $i = 1$  to 10) states, of the  $P2_1/a$  phase employed for the energy-mapping analysis, where the gray and white circles represent the up and down spin sites of Cu<sup>2+</sup> ions.

Table S4. Values of  $n_i$  and  $n_i'$  for the 11 ordered spin states

|                   | $n_1$ | $n_2$ | $n_3$ | $n_4$ | $n_5$ | $n_1'$ | $n_2'$ | $n_3'$ | $n_4'$ | $n_5'$ |
|-------------------|-------|-------|-------|-------|-------|--------|--------|--------|--------|--------|
| $E_{\text{FM}}$   | -8    | -8    | -8    | -8    | -4    | -8     | -8     | -8     | -8     | -4     |
| $E_{\text{AF1}}$  | 8     | 8     | -8    | -8    | -4    | -8     | -8     | -8     | -8     | -4     |
| $E_{\text{AF2}}$  | -8    | 8     | 8     | -8    | -4    | -8     | -8     | -8     | -8     | -4     |
| $E_{\text{AF3}}$  | 8     | -8    | 8     | -8    | -4    | -8     | -8     | -8     | -8     | -4     |
| $E_{\text{AF4}}$  | -8    | -8    | -8    | -8    | -4    | 8      | 8      | -8     | -8     | -4     |
| $E_{\text{AF5}}$  | -8    | -8    | -8    | -8    | -4    | -8     | 8      | 8      | -8     | -4     |
| $E_{\text{AF6}}$  | -8    | -8    | -8    | -8    | -4    | 8      | -8     | 8      | -8     | -4     |
| $E_{\text{AF7}}$  | 0     | 0     | 0     | 8     | -4    | -8     | -8     | -8     | -8     | -4     |
| $E_{\text{AF8}}$  | -8    | -8    | -8    | -8    | -4    | 0      | 0      | 0      | 8      | -4     |
| $E_{\text{AF9}}$  | 0     | 0     | -8    | -8    | 4     | -8     | -8     | -8     | -8     | -4     |
| $E_{\text{AF10}}$ | -8    | -8    | -8    | -8    | -4    | 0      | 0      | -8     | -8     | 4      |

Table S5. Relative energies (meV/FU) obtained from DFT+U calculations

|      | $U_{\text{eff}} = 4 \text{ eV}$ | $U_{\text{eff}} = 5 \text{ eV}$ |
|------|---------------------------------|---------------------------------|
| FM   | 25.87                           | 20.25                           |
| AF1  | 2.18                            | 1.21                            |
| AF2  | 1.42                            | 1.21                            |
| AF3  | 25.14                           | 20.61                           |
| AF4  | 1.41                            | 0.58                            |
| AF5  | 0                               | 0                               |
| AF6  | 25.72                           | 21.08                           |
| AF7  | 10.31                           | 8.03                            |
| AF8  | 9.86                            | 7.65                            |
| AF9  | 13.86                           | 10.59                           |
| AF10 | 13.49                           | 10.27                           |

Table S6. Values of the spin exchanges  $J_1 - J_5$  (in K) calculated for the  $P2_1/a$  phase

|           | $U_{\text{eff}} = 4 \text{ eV}$ |         | $U_{\text{eff}} = 5 \text{ eV}$ |         |
|-----------|---------------------------------|---------|---------------------------------|---------|
|           | Layer 1                         | Layer 2 | Layer 1                         | Layer 2 |
| $J_1/J_2$ | -0.001                          | -0.025  | -0.009                          | -0.035  |
| $J_3/J_2$ | 0.031                           | 0.031   | -0.009                          | -0.006  |
| $J_4/J_2$ | 0.141                           | 0.135   | 0.145                           | 0.138   |
| $J_5/J_2$ | 0.014                           | 0.013   | 0.015                           | 0.014   |
| $J_2$     | 550 K                           | 582 K   | 446 K                           | 473 K   |

## References

1. Kresse, G.; Furthmüller, J. Efficiency of ab-initio total energy calculations for metals and semiconductors using a plane-wave basis set. *Comput. Mater. Sci.* **1996**, *6*, 15–50.
2. Kresse, G.; Furthmüller, J. Efficient iterative schemes for *ab initio* total-energy calculations using a plane-wave basis set. *Phys. Rev. B* **1996**, *54*, 11169–11186.
3. Kresse, G.; Joubert, D. From ultrasoft pseudopotentials to the projector augmented-wave method. *Phys. Rev. B* **1999**, *59*, 1758–1775.
4. Blöchl, P. E. Projector augmented-wave method. *Phys. Rev. B* **1994**, *50*, 17953–17979.
5. Perdew, J. P.; Burke, K.; Ernzerhof, M. Generalized Gradient Approximation Made Simple. *Phys. Rev. Lett.* **1996**, *77*, 3865.
6. Dudarev, S. L.; Botton, G. A.; Savrasov, S. Y.; Humphreys, C. J.; Sutton, A. P. Electron-energy-loss spectra and the structural stability of nickel oxide: An LSDA+U study. *Phys. Rev. B* **1998**, *57*, 1505–1509.
